# Supplementary material for: Impact of aging on meningeal gene expression
Source: Springer Nature journal article supplement (doi:10.1186/s12987-023-00412-9), 2023-02-06
Supplement: MOESM1 [file 12987_2023_412_MOESM1_ESM.pdf]

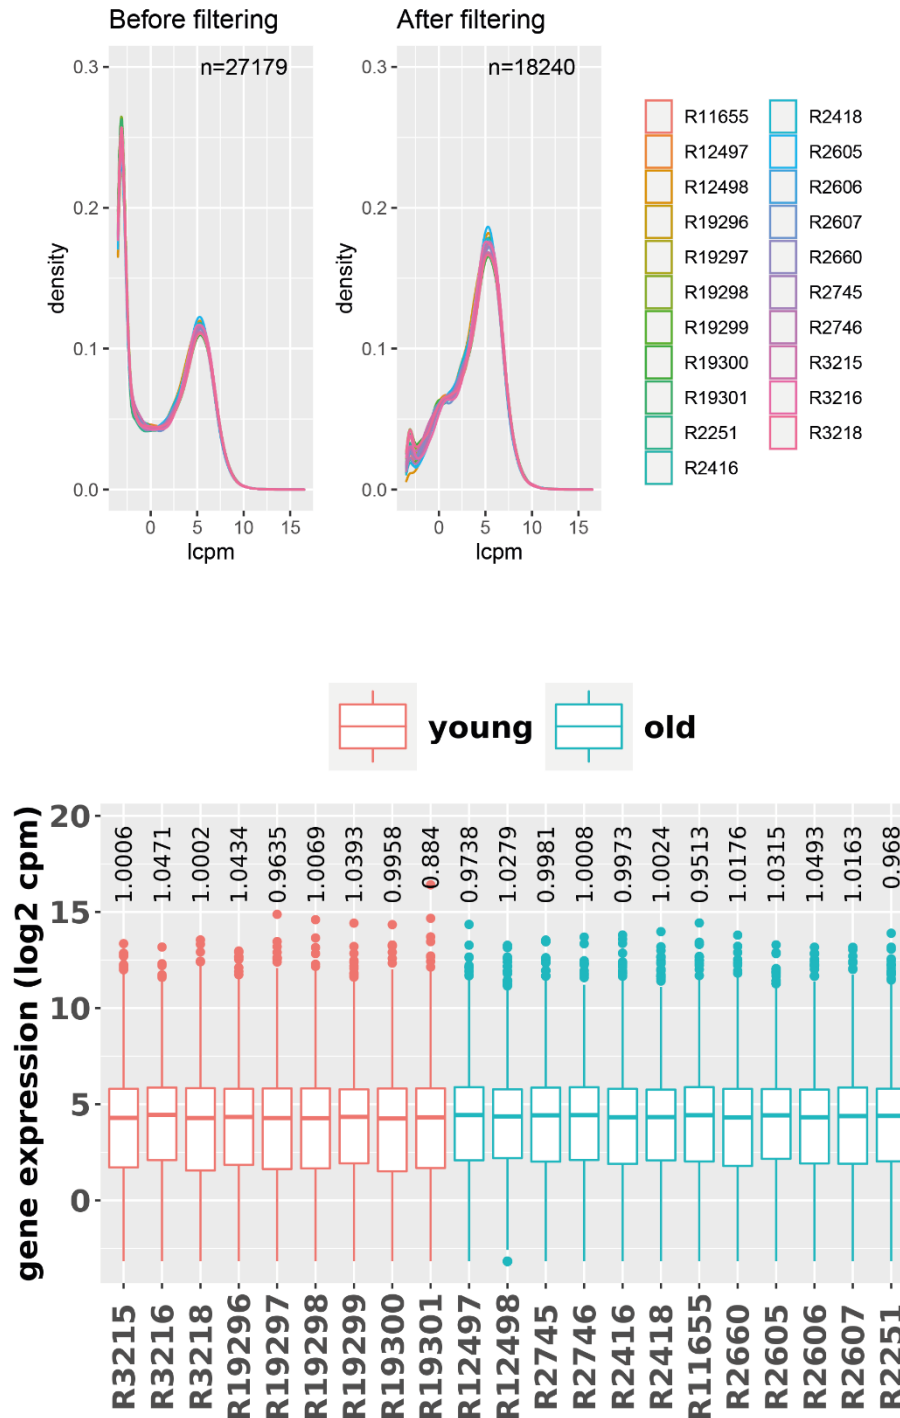

**Figure S1 Processing of RNASeq data.**

(A) Log2 counts per million (lcpm) were calculated for raw count data before (left panel) or after removal (right panel) of low expressing genes using a  $< 1$  counts per million (cpm) threshold. Shown are density plots of lcpm values for all samples included in this study. (B) Using edgeR, normalization factors to account for different library sizes were calculated. The box plot shows normalized gene expression in lcpm for each sample with the associated normalization factor.

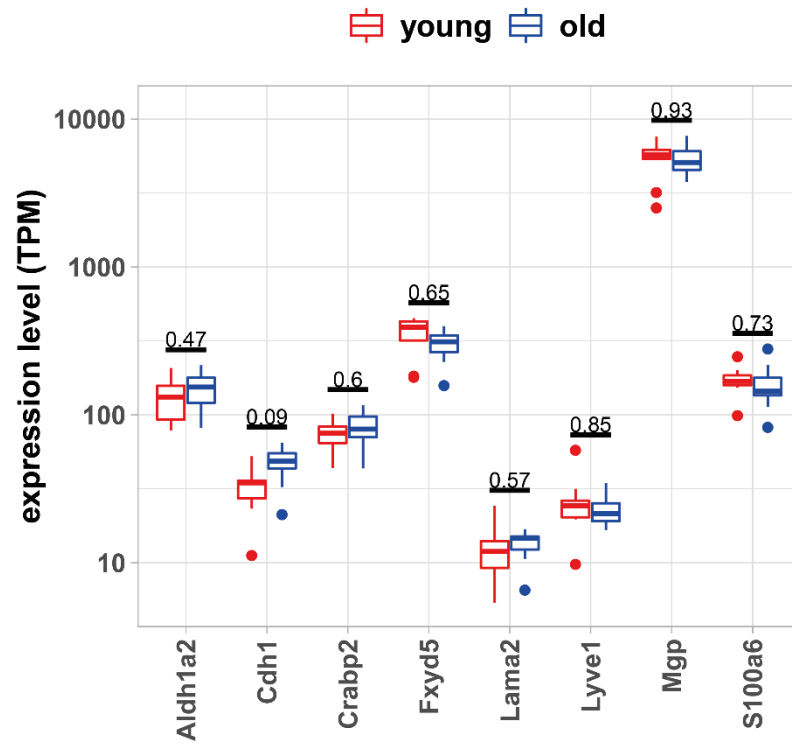

**Figure S2:**

Comparing expression of known meningeal markers between young and aged animals. P-values shown were adjusted for multiple testing according to Benjamini-Hochberg.

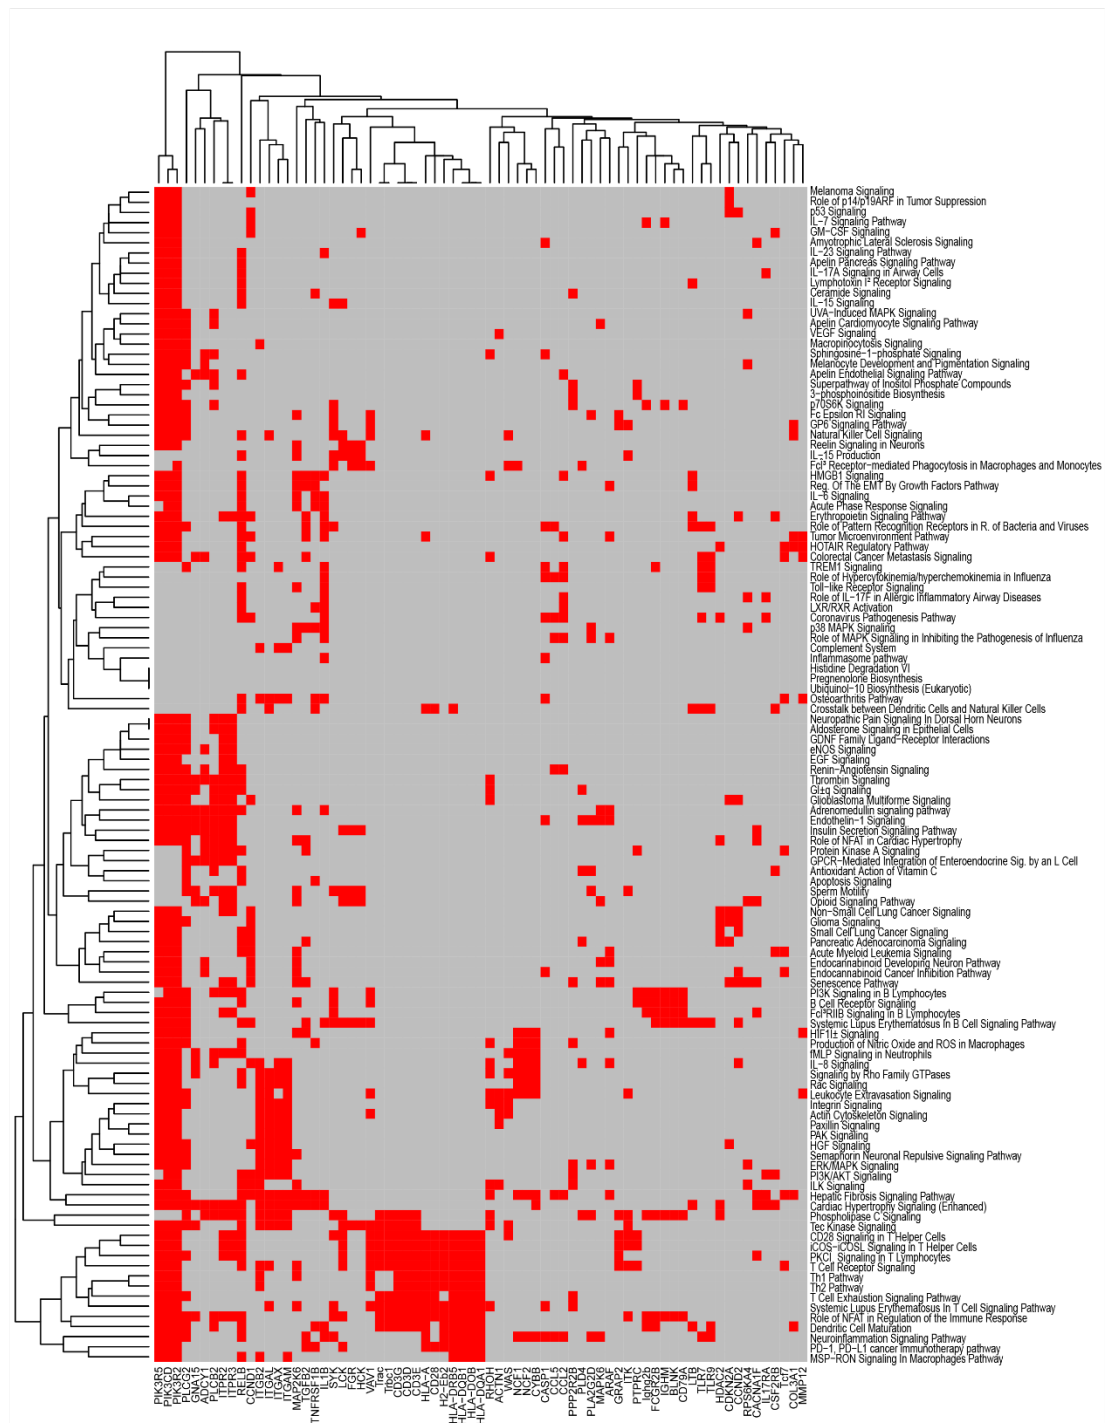



| Sample | Age (weeks) | Total RNA (ug) | RIN  | # of raw sequences | # of identified features |
|--------|-------------|----------------|------|--------------------|--------------------------|
| R2605  | 92          | 0.324          | 8.4  | 38933306           | 15729936                 |
| R2606  | 92          | 0.182          | 8.7  | 40732244           | 16230153                 |
| R2607  | 92          | 0.144          | 4.1  | 46446674           | 18895771                 |
| R2745  | 85          | 0.144          | 9.2  | 41137706           | 16770167                 |
| R2660  | 90          | 0.147          | 3.7  | 53149366           | 21888333                 |
| R2746  | 85          | 0.232          | 9.1  | 42037828           | 17143120                 |
| R19296 | 15          | 0.24           | 9    | 51211418           | 20834215                 |
| R19297 | 15          | 0.13           | 8.9  | 59645404           | 24224799                 |
| R19298 | 15          | 0.18           | 3.9  | 40279466           | 16233067                 |
| R19299 | 15          | 0.112          | 4    | 42799668           | 16870469                 |
| R19300 | 15          | 0.16           | 7.9  | 43949494           | 17847377                 |
| R19301 | 15          | 0.088          | 3.9  | 44147192           | 18162963                 |
| R2251  | 97          | 0.04563        | 5.60 | 45923162           | 18570606                 |
| R2418  | 86          | 0.02975        | 6.20 | 40375652           | 16165252                 |
| R3216  | 10          | 0.05318        | 5.70 | 41463118           | 16218832                 |
| R12498 | 80          | 0.03776        | 6.20 | 41589084           | 16845699                 |
| R11655 | 89          | 0.06036        | 5.30 | 52976638           | 21134683                 |
| R3215  | 9           | 0.07178        | 5.60 | 38205860           | 15095769                 |
| R12497 | 80          | 0.03701        | 6.20 | 47502128           | 18785257                 |
| R2416  | 86          | 0.03983        | 5.90 | 43873890           | 17699940                 |
| R3218  | 86          | 0.05605        | 6.30 | 40058188           | 15879067                 |

**Table S1 Sample overview.** Shown are unique animal identifiers, age of the animal at the time of sacrifice, total amount of RNA obtained from isolated meninges measured by NanoDrop (ThermoFisher Scientific), the RNA integrity value (RIN) obtained using BioAnalyzer (Agilent), the number of raw sequences obtained from sequencing, and the number of sequences assigned to a genomic feature.

# Supplemental file description

**File S1** Comma-separated file containing 18240 rows of data for genes identified in meninges isolated from mice. The file contains the columns: NCBI gene ID => NCBI gene id (<https://www.ncbi.nlm.nih.gov/gene>); ENSEMBL => ENSEMBL gene id ([ensembl.org](https://www.ensembl.org)) ; logFC => log2 foldchange in gene expression between young and old mice; adj.P.Val => p-value adjusted for multiple testing; AvgCountOld => average feature count across samples from young animals; AvgCountYoung => average feature count across samples from young animals; AvgCount => average feature count across all samples; SYMBOL => gene symbol (<https://www.ncbi.nlm.nih.gov/gene>); meanTPMYoung => average expression level in young animals expressed as TPM; meanTPMOld => average expression level in old animals expressed as TPM;

# Supplemental References

1. Warnes G, Bolker B, Bonebakker L, Gentleman R, Huber W, Liaw A, et al. gplots: Various R Programming Tools for Plotting Data. 3.1.3 ed2022.
